# Supplementary material for: Task-Specific Hypoactivation in Prefrontal and Temporoparietal Brain Regions During Motor Inhibition and Task Switching in Medication-Naive Children and Adolescents With Attention Deficit Hyperactivity Disorder
Source: Atypon-hosted journal article supplement (doi:10.1176/ajp.2006.163.6.1044), 2006-06-01
Supplement: ajp_163_6_1044_01.pdf [file ajp_163_6_1044_01.pdf]

**Mean Foci of Within-Group Activation for Children and Adolescents With ADHD and Healthy Comparison Subjects**

| <i>Talairach Coordinates</i>                          |          |          | Brain Region                 | <i>Brodmann's Area</i> | <i>N° of Voxels</i> |
|-------------------------------------------------------|----------|----------|------------------------------|------------------------|---------------------|
| <b>x</b>                                              | <b>y</b> | <b>z</b> |                              |                        |                     |
| Go/no go Task: successful no go trials-oddball trials |          |          |                              |                        |                     |
| <b>Healthy Comparison Subjects</b>                    |          |          |                              |                        |                     |
| -4                                                    | 63       | 15       | L mesial frontal gyrus       | 10                     | 16                  |
| 0                                                     | 59       | -13      | mesial frontal gyrus         | 11                     | 11                  |
| 51                                                    | 15       | -2       | R inferior frontal gyrus     | 47                     | 47                  |
| 0                                                     | 11       | 31       | anterior cingulate gyrus     | 24                     | 13                  |
| 22                                                    | -7       | 15       | R caudate                    | n/a                    | 13                  |
| -29                                                   | -11      | -18      | L hippocampus                | n/a                    | 11                  |
| -61                                                   | -26      | 9        | L superior temporal gyrus    | 42                     | 11                  |
| 4                                                     | -59      | 20       | R post cingulate gyrus       | 23                     | 18                  |
| -36                                                   | -59      | 26       | L middle temporal gyrus      | 39                     | 17                  |
| -11                                                   | -67      | 26       | L precuneus                  | 31                     | 14                  |
| <b>ADHD</b>                                           |          |          |                              |                        |                     |
| 14                                                    | 52       | -13      | R superior frontal gyrus     | 11                     | 32                  |
| -36                                                   | 37       | 4        | L inferior frontal gyrus     | 45                     | 49                  |
| -40                                                   | 7        | -18      | L superior temporal gyrus    | 38                     | 20                  |
| -7                                                    | -41      | -24      | L cerebellum (anterior lobe) | n/a                    | 9                   |
| -43                                                   | -59      | -24      | L cerebellum (tuber)         | n/a                    | 7                   |

|     |     |     |                                  |     |    |
|-----|-----|-----|----------------------------------|-----|----|
| -33 | -70 | -35 | L cerebellum (semi-lunar lobule) | n/a | 13 |
|-----|-----|-----|----------------------------------|-----|----|

| <b>Stroop Task: successful Stroop trials-congruent trials</b> |     |     |                           |     |    |
|---------------------------------------------------------------|-----|-----|---------------------------|-----|----|
| <b>Healthy Comparison Subjects</b>                            |     |     |                           |     |    |
| -18                                                           | 63  | -7  | L superior frontal gyrus  | 10  | 6  |
| 43                                                            | 26  | 31  | R middle frontal gyrus    | 9   | 15 |
| -43                                                           | 22  | -13 | L inferior frontal gyrus  | 47  | 10 |
| 54                                                            | -4  | 26  | R precentral gyrus        | 6   | 22 |
| -58                                                           | -7  | 4   | L superior temporal gyrus | 22  | 6  |
| 54                                                            | -15 | 20  | R post central gyrus      | 43  | 13 |
| -36                                                           | -67 | -29 | L cerebellum (tuber)      | n/a | 5  |
| 40                                                            | -67 | -18 | R cerebellum (declive)    | n/a | 12 |
| <b>ADHD</b>                                                   |     |     |                           |     |    |
| 36                                                            | 19  | 15  | R inferior frontal gyrus  | 45  | 7  |
| 54                                                            | 0   | -13 | R middle temporal gyrus   | 21  | 8  |
| 4                                                             | -7  | 15  | R thalamus                | n/a | 23 |
| 14                                                            | -15 | 4   | R putamen                 | n/a | 15 |
| -29                                                           | -22 | 48  | L precentral gyrus        | 4   | 6  |
| 54                                                            | -33 | -7  | R middle temporal gyrus   | 21  | 46 |
| -36                                                           | -63 | -29 | L cerebellum (tuber)      | n/a | 48 |

| <b>Switch Task: successful Switch trials- Repeat trials</b> |     |     |                            |     |     |
|-------------------------------------------------------------|-----|-----|----------------------------|-----|-----|
| <b>Healthy Comparison Subjects</b>                          |     |     |                            |     |     |
| 4                                                           | -4  | 42  | R anterior cingulate       | 24  | 43  |
| -18                                                         | -11 | 20  | L caudate                  | n/a | 14  |
| 22                                                          | -22 | 9   | R putamen                  | n/a | 11  |
| -58                                                         | -22 | 9   | L superior temporal gyrus  | 42  | 191 |
| 40                                                          | -33 | 42  | R inferior parietal lobe   | 40  | 286 |
| -36                                                         | -44 | 53  | L inferior parietal lobe   | 40  | 18  |
| 36                                                          | -48 | -2  | R middle temporal gyrus    | 21  | 120 |
| <b>ADHD</b>                                                 |     |     |                            |     |     |
| 18                                                          | 44  | -13 | R superior frontal gyrus   | 11  | 9   |
| -7                                                          | 33  | -7  | L anterior cingulate gyrus | 32  | 6   |
| 11                                                          | -11 | 42  | R anterior cingulate gyrus | 32  | 5   |
| -36                                                         | -33 | 42  | L inferior parietal lobe   | 40  | 17  |

**Three-Dimensional Clusters of Brain Regions of Increased Activation in Children And Adolescents With ADHD and Healthy Comparison Subjects**

| <i>Talairach Coordinates</i>                                                                      |            |           | Brain Region                     | <i>Brodmann's Area</i> | <i>N° of Voxels</i> |
|---------------------------------------------------------------------------------------------------|------------|-----------|----------------------------------|------------------------|---------------------|
| x                                                                                                 | y          | z         |                                  |                        |                     |
| <b>Healthy&gt;ADHD</b>                                                                            |            |           |                                  |                        |                     |
| <b>Go/no go Task: successful no go stimuli contrasted with oddball stimuli</b>                    |            |           |                                  |                        |                     |
| -7                                                                                                | 59         | -2        | rostral mesial prefrontal lobe   | 9/10/11                | 33                  |
| Stroop Task: successful Stroop contrasted with oddball stimuli: <b>No significant differences</b> |            |           |                                  |                        |                     |
| <b>Switch Task: successful Switch contrasted with repeat stimuli</b>                              |            |           |                                  |                        |                     |
| <b>-61</b>                                                                                        | <b>-19</b> | <b>9</b>  | <b>L superior temporal gyri</b>  | <b>22</b>              | <b>182</b>          |
| <i>-54</i>                                                                                        | <i>11</i>  | <i>4</i>  | <i>L inferior frontal gyrus</i>  | <i>44</i>              |                     |
| <i>-40</i>                                                                                        | <i>0</i>   | <i>20</i> | <i>L precentral gyrus</i>        | <i>6</i>               |                     |
| <i>-40</i>                                                                                        | <i>-19</i> | <i>-2</i> | <i>L insula</i>                  | <i>n/a</i>             |                     |
| <i>-61</i>                                                                                        | <i>-19</i> | <i>9</i>  | <i>L superior temporal gyrus</i> | <i>42</i>              |                     |
| <b>43</b>                                                                                         | <b>-52</b> | <b>4</b>  | <b>R middle temporal gyrus</b>   | <b>21</b>              | <b>493</b>          |
| <i>40</i>                                                                                         | <i>15</i>  | <i>15</i> | <i>R inferior frontal gyrus</i>  | <i>44/45</i>           |                     |
| <i>43</i>                                                                                         | <i>-26</i> | <i>-2</i> | <i>R middle temporal gyrus</i>   | <i>21</i>              |                     |
| <i>53</i>                                                                                         | <i>-28</i> | <i>28</i> | <i>R inferior parietal lobe</i>  | <i>40</i>              |                     |
| <i>58</i>                                                                                         | <i>-30</i> | <i>4</i>  | <i>R superior temporal gyrus</i> | <i>22/42</i>           |                     |
| <b>ADHD &gt; Healthy</b>                                                                          |            |           |                                  |                        |                     |
| <b>No significant differences in any condition</b>                                                |            |           |                                  |                        |                     |

(For large clusters, Talairach coordinates of significant two-dimensional foci within these clusters are also shown in italics)
